# Supplementary material
Source: Research Square preprint supplement (doi:10.21203/rs.3.rs-9034306/v1)
Supplement: Supplementary file 1 [file 959f291cb37c925e1508979f.pdf]

Supplementary Table 1. Raw data matrix of species, morphological data and carrier frequency used in the PGLM analysis.

|    | Species                                            | File length (mm) | Vibrating area (mm <sup>2</sup> ) | Frequency (kHz) | Ln file | Ln Vibrating Area | Ln Frequency |
|----|----------------------------------------------------|------------------|-----------------------------------|-----------------|---------|-------------------|--------------|
| 1  | Acantheremus nov sp TAMUIC IGC 003586              | 1.43             | 2.80                              | 24.00           | 0.36    | 1.02961942        | 3.17805383   |
| 2  | Acanthodis curvidens TAMUIC IGC 003904             | 2.60             | 8.37                              | 22.00           | 0.96    | 2.12465388        | 3.09104245   |
| 3  | Aglaothorax ovatus TAMUIC IGC 003313               | 5.10             | 6.90                              | 14.30           | 1.63    | 1.93152141        | 2.66025954   |
| 4  | Anabrus simplex OR034                              | 4.20             | 5.70                              | 13.55           | 1.44    | 1.74046617        | 2.60638655   |
| 5  | Artiotonus artius TAMUIC IGC 003898                | 1.75             | 1.58                              | 40.70           | 0.56    | 0.45742485        | 3.70622809   |
| 6  | Artiotonus tinae TAMUIC IGC 003895                 | 1.70             | 1.24                              | 35.40           | 0.53    | 0.21511138        | 3.56671182   |
| 7  | Axyllus philippinus TAMUIC IGC 003577              | 1.56             | 1.15                              | 34.70           | 0.44    | 0.13976194        | 3.54673969   |
| 8  | Bucrates capitatus TAMUIC IGC 003887               | 3.20             | 12.20                             | 9.50            | 1.16    | 2.50143595        | 2.2512918    |
| 9  | Burned toast Anchiaya nov gen sp TAMUIC IGC 003608 | 1.43             | 1.41                              | 25.40           | 0.36    | 0.3435897         | 3.23474917   |
| 10 | Championica pilata TAMUIC IGC 003643               | 1.97             | 2.38                              | 22.70           | 0.68    | 0.86710049        | 3.12236492   |
| 11 | Chibchella nigrospicula TAMUIC IGC 003686          | 3.04             | 10.34                             | 9.42            | 1.11    | 2.33601987        | 2.24283509   |
| 12 | Chondroderella borneensis TAMUIC IGC 002897        | 2.60             | 6.51                              | 11.60           | 0.96    | 1.87333946        | 2.4510051    |
| 13 | Clonia sp TAMUIC IGC 002990                        | 2.46             | 2.88                              | 18.00           | 0.9     | 1.05779029        | 2.89037176   |
| 14 | Cocconotus sp TAMUIC IGC 002838                    | 1.58             | 2.33                              | 31.10           | 0.46    | 0.84586827        | 3.43720782   |
| 15 | Conocephalus cf versicolor TAMUIC IGC 003607       | 1.25             | 0.97                              | 36.00           | 0.22    | -0.0304592        | 3.58351894   |
| 16 | Copiphora brevisrostris TAMUIC IGC 003906          | 3.20             | 4.46                              | 15.60           | 1.16    | 1.49514877        | 2.74727091   |
| 17 | Copiphora gorgonensis TAMUIC IGC 003616            | 1.98             | 2.49                              | 22.60           | 0.68    | 0.91228271        | 3.11794991   |
| 18 | Copiphora gracilis TAMUIC IGC 003595               | 2.00             | 3.65                              | 20.60           | 0.69    | 1.29472717        | 3.02529108   |
| 19 | Copiphora vigorosa TAMUIC IGC 003901               | 3.12             | 6.00                              | 10.19           | 1.14    | 1.79175947        | 2.32140685   |
| 20 | Cyphoderris buckelli F2255                         | 2.85             | 3.30                              | 13.30           | 1.05    | 1.19392247        | 2.58776404   |
| 21 | Cyphoderris monstrosa INSfnrTBQRAAPEI 16           | 3.14             | 9.76                              | 13.00           | 1.14    | 2.2782924         | 2.56494936   |
| 22 | Cyphoderris strepitans F2289                       | 3.30             | 9.07                              | 12.70           | 1.19    | 2.20497226        | 2.54160199   |
| 23 | Dioncomena jagoti TAMUIC IGC 003644                | 1.31             | 1.60                              | 53.00           | 0.27    | 0.47000363        | 3.97029191   |
| 24 | Docidocercus gausodontus TAMUIC IGC 003610         | 2.10             | 3.00                              | 22.50           | 0.74    | 1.09861229        | 3.11351531   |
| 25 | Docidocercus gigliottii TAMUIC IGC 003596          | 2.41             | 2.73                              | 26.80           | 0.88    | 1.00430161        | 3.28840189   |
| 26 | Docidocercus sagittatus TAMUIC IGC 003652          | 2.00             | 2.90                              | 30.00           | 0.69    | 1.06471074        | 3.40119738   |
| 27 | Ephippiger ephippiger TAMUIC IGC 003998            | 4.30             | 5.93                              | 20.00           | 1.46    | 1.78002421        | 2.99573227   |
| 28 | Erioloides consobrinus TAMUIC IGC 002802           | 1.90             | 2.90                              | 22.90           | 0.64    | 1.06471074        | 3.13113691   |
| 29 | Eriolus sp 2 TAMUIC IGC 003609                     | 1.74             | 1.35                              | 30.30           | 0.55    | 0.30010459        | 3.41114771   |
| 30 | Eschatoceras punctifrons OR550                     | 0.74             | 0.54                              | 64.00           | -0.3    | -0.6161861        | 4.15888308   |
| 31 | Euanisous teuthroides TAMUIC IGC 003583            | 0.73             | 0.45                              | 30.30           | -0.31   | -0.7985077        | 3.41114771   |
| 32 | Eubliastes aethiops TAMUIC IGC 003653              | 2.87             | 3.76                              | 21.60           | 1.05    | 1.32441896        | 3.07269331   |
| 33 | Eubliastes viridicarpus TAMUIC IGC 003907          | 3.60             | 9.17                              | 23.40           | 1.28    | 2.21593729        | 3.15273602   |
| 34 | Eumecopoda cyrtoscelis OR385                       | 2.63             | 5.60                              | 3.10            | 0.97    | 1.7227666         | 1.13140211   |
| 35 | Graminofolium eastneri TAMUIC IGC 003597           | 1.45             | 0.85                              | 27.70           | 0.37    | -0.1625189        | 3.32143241   |
| 36 | Gryllus bimaculatus TAMUIC IGC 002933              | 5.60             | 28.60                             | 4.80            | 1.72    | 3.35340672        | 1.56861592   |
| 37 | Hemisaga sp OR483                                  | 3.00             | 1.97                              | 7.40            | 1.1     | 0.67803354        | 2.00148      |
| 38 | Hexacentrus unicolor TAMUIC IGC 002896             | 2.10             | 8.80                              | 11.00           | 0.74    | 2.17475172        | 2.39789527   |
| 39 | Idiarthron sp TAMUIC IGC 002825                    | 2.00             | 3.61                              | 23.90           | 0.69    | 1.28370777        | 3.17387846   |
| 40 | Ischnomela gracilis TAMUIC IGC 002822              | 2.50             | 1.98                              | 15.10           | 0.92    | 0.68309684        | 2.71469474   |
| 41 | Ischnomela sp Gorgona TAMUIC IGC 003891            | 2.46             | 1.95                              | 16.80           | 0.9     | 0.66782937        | 2.82137889   |
| 42 | Kuzicus denticulatus TAMUIC IGC 003576             | 1.10             | 1.46                              | 39.60           | 0.1     | 0.37843644        | 3.67882912   |
| 43 | Leptophyes punctatissima OR044                     | 1.25             | 1.40                              | 41.00           | 0.22    | 0.33647224        | 3.71357207   |
| 44 | Leurophyllum sp TAMUIC IGC 003657                  | 1.60             | 4.50                              | 23.00           | 0.47    | 1.5040774         | 3.13549422   |
| 45 | Lipotaetes maculatus TAMUIC IGC 002853             | 1.20             | 1.50                              | 33.10           | 0.18    | 0.40546511        | 3.49953328   |
| 46 | Lirometopum coronatum OR586                        | 3.20             | 11.40                             | 10.80           | 1.16    | 2.43361336        | 2.37954613   |
| 47 | Macrochton macromelos TAMUIC IGC 003902            | 2.84             | 6.65                              | 13.80           | 1.04    | 1.89461685        | 2.62466859   |
| 48 | Mecopoda cf elongata TAMUIC IGC 002926             | 4.88             | 20.95                             | 7.00            | 1.59    | 3.04213865        | 1.94591015   |
| 49 | Metriopectera brachyptera OR070                    | 1.32             | 2.54                              | 30.00           | 0.28    | 0.93216408        | 3.40119738   |
| 50 | Microcentrum lobophylloides TAMUIC IGC 003620      | 3.73             | 3.37                              | 11.70           | 1.32    | 1.21491274        | 2.45958884   |
| 51 | Microcentrum rhombifolium OR033                    | 4.70             | 11.70                             | 9.80            | 1.55    | 2.45958884        | 2.28238239   |
| 52 | Microtetragonia tachys TAMUIC IGC 003693           | 0.70             | 0.75                              | 50.00           | -0.36   | -0.2876821        | 3.91202301   |
| 53 | Mimetica incisa TAMUIC IGC 003900                  | 3.00             | 5.22                              | 17.00           | 1.1     | 1.6524974         | 2.83321334   |
| 54 | Neduba convexa TAMUIC IGC 003314                   | 3.50             | 7.83                              | 13.90           | 1.25    | 2.05796251        | 2.63188884   |
| 55 | Neobarrettia spinosa TAMUIC IGC 003909             | 4.75             | 9.09                              | 10.00           | 1.56    | 2.20717491        | 2.30258509   |
| 56 | Neoconocephalus sp TAMUIC IGC 003660               | 3.40             | 5.16                              | 12.00           | 1.22    | 1.64093658        | 2.48490665   |
| 57 | Neoscaptesus vicinus TAMUIC IGC 003743             | 2.18             | 7.20                              | 3.17            | 0.78    | 1.97408103        | 1.15373159   |
| 58 | Orchelimum erythrocephalum TAMUIC IGC 003437       | 2.90             | 6.70                              | 13.60           | 1.06    | 1.90210753        | 2.61006979   |
| 59 | Orchelimum silvaticum TAMUIC IGC 003433            | 2.52             | 5.20                              | 18.00           | 0.92    | 1.64865863        | 2.89037176   |
| 60 | Orophus tessellatus TAMUIC IGC 003892              | 2.59             | 2.43                              | 10.50           | 0.95    | 0.88789126        | 2.35137526   |
| 61 | Panacanthus gibbosus TAMUIC IGC 003582             | 5.20             | 19.35                             | 6.40            | 1.65    | 2.96269242        | 1.85629799   |
| 62 | Panacanthus intensus TAMUIC IGC 003893             | 4.48             | 12.74                             | 11.50           | 1.5     | 2.54474665        | 2.44234704   |
| 63 | Panacanthus lacrimans TAMUIC IGC 003646            | 5.43             | 16.27                             | 7.13            | 1.69    | 2.78932292        | 1.96431123   |
| 64 | Panacanthus pallicornis TAMUIC IGC 003591          | 6.27             | 14.16                             | 4.70            | 1.84    | 2.65042109        | 1.54756251   |
| 65 | Paracyphoderris erebeus PAERI                      | 3.10             | 4.80                              | 14.00           | 1.13    | 1.56861592        | 2.63905733   |
| 66 | Paragraecia temasek TAMUIC IGC 003639              | 1.50             | 2.80                              | 12.60           | 0.41    | 1.02961942        | 2.53369681   |
| 67 | Paranelytra bruneri TAMUIC IGC 003663              | 1.03             | 0.94                              | 40.90           | 0.03    | -0.0618754        | 3.71113006   |
| 68 | Pediocetes sp TAMUIC IGC 003008                    | 2.60             | 1.30                              | 18.00           | 0.96    | 0.26236426        | 2.89037176   |
| 69 | Phaneroptera brevis TAMUIC IGC 002909              | 1.70             | 1.50                              | 21.90           | 0.53    | 0.40546511        | 3.08648664   |
| 70 | Phaneroptera nana TAMUIC IGC 003628                | 1.50             | 3.20                              | 19.80           | 0.41    | 1.16315081        | 2.98568194   |
| 71 | Phlugis glabra TAMUIC IGC 003669                   | 0.46             | 0.56                              | 49.50           | -0.78   | -0.5798185        | 3.90197267   |
| 72 | Pholidoptera griseoptera TAMUIC IGC 002983         | 3.80             | 3.70                              | 21.00           | 1.34    | 1.30833282        | 3.04452244   |
| 73 | Phyllomimus inversus TAMUIC IGC 002854             | 4.40             | 9.90                              | 10.00           | 1.48    | 2.29253476        | 2.30258509   |
| 74 | Phymonotus jacinthopos TAMUIC IGC 003321           | 2.73             | 1.07                              | 16.90           | 1       | 0.06765865        | 2.82731362   |
| 75 | Pristonotus latistylus TAMUIC IGC 002841           | 5.10             | 20.22                             | 10.00           | 1.63    | 3.00667221        | 2.30258509   |
| 76 | Psyrana tigrina TAMUIC IGC 003638                  | 2.20             | 1.10                              | 35.50           | 0.79    | 0.09531018        | 3.5695327    |
| 77 | Ragoniella sp 2 TAMUIC IGC 003604                  | 2.10             | 4.99                              | 15.80           | 0.74    | 1.60743591        | 2.76000994   |
| 78 | Roeseliana roeselii OR046                          | 1.56             | 3.70                              | 21.00           | 0.44    | 1.30833282        | 3.04452244   |
| 79 | Salomona maculifrons TAMUIC IGC 003573             | 2.27             | 2.33                              | 30.50           | 0.82    | 0.84586827        | 3.41772668   |
| 80 | Satizabalus sodalis TAMUIC IGC 003666              | 3.02             | 6.20                              | 16.30           | 1.11    | 1.82454929        | 2.79116511   |
| 81 | Scambophyllum sanguinolentum TAMUIC IGC 003584     | 1.50             | 2.23                              | 23.70           | 0.41    | 0.80200159        | 3.16547505   |
| 82 | Scopiorinus fragilis TAMUIC IGC 003647             | 2.26             | 21.21                             | 25.60           | 0.82    | 3.05447277        | 3.24259235   |
| 83 | Speculophilus hishquiten TAMUIC IGC 003894         | 0.51             | 0.29                              | 50.00           | -0.67   | -1.2378744        | 3.91202301   |
| 84 | Sphyrometopa femorata TAMUIC IGC 003623            | 3.28             | 4.58                              | 11.00           | 1.19    | 1.521699          | 2.39789527   |
| 85 | Stetharasa exarmata TAMUIC IGC 003658              | 2.90             | 4.12                              | 22.85           | 1.06    | 1.41585316        | 3.12895112   |
| 86 | Supersonus aequoreus TAMUIC IGC 003631             | 0.60             | 0.23                              | 150.00          | -0.51   | -1.469676         | 5.01063529   |
| 87 | Supersonus piercei TAMUIC IGC 003897               | 0.70             | 0.32                              | 129.00          | -0.36   | -1.1394343        | 4.8598124    |
| 88 | Teleutias cf fasciatus TAMUIC IGC 003602           | 1.20             | 2.14                              | 24.10           | 0.18    | 0.76080583        | 3.18221184   |
| 89 | Teleutias sp OR391 (cf castaneus)                  | 1.40             | 1.52                              | 42.10           | 0.34    | 0.41871033        | 3.74004774   |
| 90 | Tettigonia catans OR075                            | 2.50             | 5.90                              | 8.00            | 0.92    | 1.77495235        | 2.07944154   |
| 91 | Tettigonia viridissima OR040                       | 2.40             | 4.00                              | 12.03           | 0.88    | 1.38629436        | 2.48740353   |
| 92 | Trichotettix nov sp TAMUIC IGC 003672              | 1.47             | 4.00                              | 20.00           | 0.39    | 0.33647224        | 2.99573227   |
| 93 | Trichotettix pilosula TAMUIC IGC 003589            | 1.71             | 1.39                              | 16.90           | 0.54    | 0.32930375        | 2.82731362   |
| 94 | Tricentrus cf magdalenae TAMUIC IGC 003605         | 2.79             | 3.80                              | 21.00           | 1.03    | 1.33500107        | 3.04452244   |
| 95 | Typophyllum spuricolus OR196                       | 5.50             | 17.30                             | 7.00            | 1.7     | 2.8507065         | 1.94591015   |

**Supplementary Table 4.** Training dataset for Gaussian Process Regression model. Predictor variables include stridulatory file length (mm), total tooth number, dominant frequency (kHz), and syllable duration (ms). Syllable rate (syllables s<sup>-1</sup>) was calculated at 20 °C using published temperature dependent relationships.

| Species                          | Family            | File length [mm] | Number of teeth | $f_c$ [kHz] | Syllable duration [ms] | Syllable rate (s <sup>-1</sup> ) at 20°C |
|----------------------------------|-------------------|------------------|-----------------|-------------|------------------------|------------------------------------------|
| <i>Cyphoderris strepitans</i>    | Prophalangopsidae | 3.1              | 88              | 12.7        | 4.1                    | 43.32                                    |
| <i>Cyphoderris monstrosa</i>     | Prophalangopsidae | 3.49             | 110             | 13          | 6.6                    | 60.83                                    |
| <i>Cyphoderris buckelli</i>      | Prophalangopsidae | 2.25             | 72              | 13.3        | 3.6                    | 53.42                                    |
| <i>Cyrtoxopha gundlachi</i>      | Trigonidiinae     | 1.34             | 192             | 5.9         | 32                     | 12.75                                    |
| <i>Cyrtoxopha columbiana</i>     | Trigonidiinae     | 1.29             | 150             | 6.6         | 17                     | 27.76                                    |
| <i>Cyrtoxopha nola</i>           | Trigonidiinae     | 1.04             | 120             | 6.4         | 15.5                   | 40.88                                    |
| <i>Cyrtoxopha confusa</i>        | Trigonidiinae     | 0.85             | 88              | 7.5         | 9.5                    | 68.47                                    |
| <i>Neoconocephalus bivocatus</i> | Tettigoniidae     | 2.5              | 83.6            | 9           | 3.5                    | 59.69                                    |
| <i>Neoconocephalus triops</i>    | Tettigoniidae     | 2.1              | 75.8            | 11          | 10                     | 91.93                                    |
| <i>Amblycorypha alexanderi</i>   | Tettigoniidae     | 2.19             | 97.7            | 13.6        | 113                    | 2.48                                     |
| <i>Amblycorypha rotundifolia</i> | Tettigoniidae     | 1.91             | 93              | 10          | 16                     | 18.13                                    |
| <i>Amblycorypha bartrami</i>     | Tettigoniidae     | 1.99             | 92.94           | 9.76        | 40                     | 7.78                                     |
| <i>Neoxabea bipunctata</i>       | Gryllidae         | 0.94             | 21.5            | 3.4         | 8                      | 82.88                                    |
| <i>Anurogryllus arboreus</i>     | Gryllidae         | 2.4              | 72              | 5.6         | 7                      | 63.57                                    |
| <i>Oecanthus celerinictus</i>    | Gryllidae         | 1.07             | 41.1            | 3.9         | 13                     | 46.66                                    |
| <i>Oecanthus quadripunctatus</i> | Gryllidae         | 1.47             | 56.7            | 4.2         | 16                     | 32.26                                    |
| <i>Oecanthus exclamationis</i>   | Gryllidae         | 0.97             | 20.5            | 2.6         | 8                      | 62.6                                     |
| <i>Oecanthus niveus</i>          | Gryllidae         | 1                | 26              | 3           | 13.5                   | 54.48                                    |
| <i>Oecanthus fultoni</i>         | Gryllidae         | 1.79             | 41.3            | 2.9         | 16.2                   | 40.58                                    |
| <i>Oecanthus latipennis</i>      | Gryllidae         | 1.48             | 42.1            | 2.9         | 19                     | 41.36                                    |
| <i>Orocharis saltator</i>        | Gryllidae         | 2.08             | 77              | 5.1         | 15                     | 44.22                                    |
| <i>Orocharis luteolira</i>       | Gryllidae         | 1.97             | 75              | 5.1         | 12                     | 55.21                                    |
| <i>Orocharis tricornis</i>       | Gryllidae         | 2.16             | 120             | 6.1         | 19.5                   | 33.24                                    |
| <i>Orocharis nigrifrons</i>      | Gryllidae         | 1.96             | 135             | 4.8         | 21                     | 34.25                                    |
| <i>Orocharis diplastes</i>       | Gryllidae         | 1.95             | 104             | 5.7         | 25                     | 11.54                                    |

**Supplementary Table 3.** Supplementary training set used to train the model.

| Species                          | Family            | File length [mm] | Number of teeth | $f_c$ [kHz] | Syllable duration [ms] | Syllable rate (s-1) at 20°C |
|----------------------------------|-------------------|------------------|-----------------|-------------|------------------------|-----------------------------|
| <i>Cyphoderris strepitans</i>    | Prophalangopsidae | 3.1              | 88              | 12.7        | 4.1                    | 43.32                       |
| <i>Cyphoderris monstrosa</i>     | Prophalangopsidae | 3.49             | 110             | 13          | 6.6                    | 60.83                       |
| <i>Cyphoderris buckelli</i>      | Prophalangopsidae | 2.25             | 72              | 13.3        | 3.6                    | 53.42                       |
| <i>Cyrtoxopha gundlachi</i>      | Trigonidiinae     | 1.34             | 192             | 5.9         | 32                     | 12.75                       |
| <i>Cyrtoxopha columbiana</i>     | Trigonidiinae     | 1.29             | 150             | 6.6         | 17                     | 27.76                       |
| <i>Cyrtoxopha nola</i>           | Trigonidiinae     | 1.04             | 120             | 6.4         | 15.5                   | 40.88                       |
| <i>Cyrtoxopha confusa</i>        | Trigonidiinae     | 0.85             | 88              | 7.5         | 9.5                    | 68.47                       |
| <i>Neoconocephalus bivocatus</i> | Tettigoniidae     | 2.5              | 83.6            | 9           | 3.5                    | 59.69                       |
| <i>Neoconocephalus triops</i>    | Tettigoniidae     | 2.1              | 75.8            | 11          | 10                     | 91.93                       |
| <i>Amblycorypha alexanderi</i>   | Tettigoniidae     | 2.19             | 97.7            | 13.6        | 113                    | 2.48                        |
| <i>Amblycorypha rotundifolia</i> | Tettigoniidae     | 1.91             | 93              | 10          | 16                     | 18.13                       |
| <i>Amblycorypha bartrami</i>     | Tettigoniidae     | 1.99             | 92.94           | 9.76        | 40                     | 7.78                        |
| <i>Neoxabea bipunctata</i>       | Gryllidae         | 0.94             | 21.5            | 3.4         | 8                      | 82.88                       |
| <i>Anurogryllus arboreus</i>     | Gryllidae         | 2.4              | 72              | 5.6         | 7                      | 63.57                       |
| <i>Oecanthus celerinictus</i>    | Gryllidae         | 1.07             | 41.1            | 3.9         | 13                     | 46.66                       |
| <i>Oecanthus quadripunctatus</i> | Gryllidae         | 1.47             | 56.7            | 4.2         | 16                     | 32.26                       |
| <i>Oecanthus exclamationis</i>   | Gryllidae         | 0.97             | 20.5            | 2.6         | 8                      | 62.6                        |
| <i>Oecanthus niveus</i>          | Gryllidae         | 1                | 26              | 3           | 13.5                   | 54.48                       |
| <i>Oecanthus fultoni</i>         | Gryllidae         | 1.79             | 41.3            | 2.9         | 16.2                   | 40.58                       |
| <i>Oecanthus latipennis</i>      | Gryllidae         | 1.48             | 42.1            | 2.9         | 19                     | 41.36                       |
| <i>Orocharis saltator</i>        | Gryllidae         | 2.08             | 77              | 5.1         | 15                     | 44.22                       |
| <i>Orocharis luteolira</i>       | Gryllidae         | 1.97             | 75              | 5.1         | 12                     | 55.21                       |
| <i>Orocharis tricornis</i>       | Gryllidae         | 2.16             | 120             | 6.1         | 19.5                   | 33.24                       |
| <i>Orocharis nigrifrons</i>      | Gryllidae         | 1.96             | 135             | 4.8         | 21                     | 34.25                       |
| <i>Orocharis diplastes</i>       | Gryllidae         | 1.95             | 104             | 5.7         | 25                     | 11.54                       |

**Supplementary Table 4.** Training dataset for Gaussian Process Regression model. Predictor variables include stridulatory file length (mm), total tooth number, dominant frequency (kHz), and syllable duration (ms). Syllable rate (syllables s<sup>-1</sup>) was calculated at 20 °C using published temperature dependent relationships.

| Species                          | Family            | File length [mm] | Number of teeth | $f_c$ [kHz] | Syllable duration [ms] | Syllable rate (s <sup>-1</sup> ) at 20°C |
|----------------------------------|-------------------|------------------|-----------------|-------------|------------------------|------------------------------------------|
| <i>Cyphoderris strepitans</i>    | Prophalangopsidae | 3.1              | 88              | 12.7        | 4.1                    | 43.32                                    |
| <i>Cyphoderris monstrosa</i>     | Prophalangopsidae | 3.49             | 110             | 13          | 6.6                    | 60.83                                    |
| <i>Cyphoderris buckelli</i>      | Prophalangopsidae | 2.25             | 72              | 13.3        | 3.6                    | 53.42                                    |
| <i>Cyrtoxopha gundlachi</i>      | Trigonidiinae     | 1.34             | 192             | 5.9         | 32                     | 12.75                                    |
| <i>Cyrtoxopha columbiana</i>     | Trigonidiinae     | 1.29             | 150             | 6.6         | 17                     | 27.76                                    |
| <i>Cyrtoxopha nola</i>           | Trigonidiinae     | 1.04             | 120             | 6.4         | 15.5                   | 40.88                                    |
| <i>Cyrtoxopha confusa</i>        | Trigonidiinae     | 0.85             | 88              | 7.5         | 9.5                    | 68.47                                    |
| <i>Neoconocephalus bivocatus</i> | Tettigoniidae     | 2.5              | 83.6            | 9           | 3.5                    | 59.69                                    |
| <i>Neoconocephalus triops</i>    | Tettigoniidae     | 2.1              | 75.8            | 11          | 10                     | 91.93                                    |
| <i>Amblycorypha alexanderi</i>   | Tettigoniidae     | 2.19             | 97.7            | 13.6        | 113                    | 2.48                                     |
| <i>Amblycorypha rotundifolia</i> | Tettigoniidae     | 1.91             | 93              | 10          | 16                     | 18.13                                    |
| <i>Amblycorypha bartrami</i>     | Tettigoniidae     | 1.99             | 92.94           | 9.76        | 40                     | 7.78                                     |
| <i>Neoxabea bipunctata</i>       | Gryllidae         | 0.94             | 21.5            | 3.4         | 8                      | 82.88                                    |
| <i>Anurogryllus arboreus</i>     | Gryllidae         | 2.4              | 72              | 5.6         | 7                      | 63.57                                    |
| <i>Oecanthus celerinictus</i>    | Gryllidae         | 1.07             | 41.1            | 3.9         | 13                     | 46.66                                    |
| <i>Oecanthus quadripunctatus</i> | Gryllidae         | 1.47             | 56.7            | 4.2         | 16                     | 32.26                                    |
| <i>Oecanthus exclamationis</i>   | Gryllidae         | 0.97             | 20.5            | 2.6         | 8                      | 62.6                                     |
| <i>Oecanthus niveus</i>          | Gryllidae         | 1                | 26              | 3           | 13.5                   | 54.48                                    |
| <i>Oecanthus fultoni</i>         | Gryllidae         | 1.79             | 41.3            | 2.9         | 16.2                   | 40.58                                    |
| <i>Oecanthus latipennis</i>      | Gryllidae         | 1.48             | 42.1            | 2.9         | 19                     | 41.36                                    |
| <i>Orocharis saltator</i>        | Gryllidae         | 2.08             | 77              | 5.1         | 15                     | 44.22                                    |
| <i>Orocharis luteolira</i>       | Gryllidae         | 1.97             | 75              | 5.1         | 12                     | 55.21                                    |
| <i>Orocharis tricornis</i>       | Gryllidae         | 2.16             | 120             | 6.1         | 19.5                   | 33.24                                    |
| <i>Orocharis nigrifrons</i>      | Gryllidae         | 1.96             | 135             | 4.8         | 21                     | 34.25                                    |
| <i>Orocharis diplastes</i>       | Gryllidae         | 1.95             | 104             | 5.7         | 25                     | 11.54                                    |
